# Supplementary material
Source: Springer Nature journal article supplement (https://www.springermedizin.de/resource/supplementary/13063_2011_1021_MOESM1_ESM.pdf/9619604)
Supplement: MOESM1 [file 9619604]

**Prospective observational study**

**Randomised controlled trial**

Patient with PG identified and consented

Decide with patient on best treatment

TOPICAL TREATMENT required

SYSTEMIC TREATMENT required

Prescribe topical treatment

Week 2 Outcome assessment\*

Normal care as required Outcome assessment\*

Week 6 Outcome assessment\*

Normal care as required Outcome assessment\*

6 months Outcome assessment (unless already healed)

Oral prednisolone  
0.75 mg/kg/day  
n = 70

Oral ciclosporin  
4 mg/kg/day  
n = 70

Week 2 Outcome assessment\*

Normal care as required Outcome assessment\*

Week 6 Outcome assessment\*

Normal care as required Outcome assessment\*

6 months Outcome assessment (unless already healed)
